# Supplementary material
Source: Springer Nature journal article supplement (https://www.springermedizin.de/resource/supplementary/12911_2013_730_MOESM4_ESM.pdf/9526230)
Supplement: MOESM4 [file 9526230]

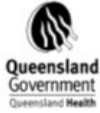

**Metro South Health Service District**  
**Indigenous Antenatal Health Check**  
 Community Health

|             |        |
|-------------|--------|
| UR Number   |        |
| Surname     |        |
| Other Names |        |
| DOB         |        |
| Sex         | Female |

An \* indicates a mandatory field.

**PATIENT INFORMATION**

|                                                       |                                                                                                                                                                                                               |         |                      |
|-------------------------------------------------------|---------------------------------------------------------------------------------------------------------------------------------------------------------------------------------------------------------------|---------|----------------------|
| Age: *                                                | <input type="text"/>                                                                                                                                                                                          |         |                      |
| Phone:                                                | <input type="text"/>                                                                                                                                                                                          | Mobile: | <input type="text"/> |
| Child:                                                | <input type="radio"/> Aboriginal <input type="radio"/> Aboriginal & Torres Strait Islander <input type="radio"/> Torres Strait Islander <input type="radio"/> Other <input checked="" type="radio"/> Missing* |         |                      |
| Mother:                                               | <input type="radio"/> Aboriginal <input type="radio"/> Aboriginal & Torres Strait Islander <input type="radio"/> Torres Strait Islander <input type="radio"/> Other <input checked="" type="radio"/> Missing* |         |                      |
| Mother's Marital Status:                              | <input type="radio"/> Single <input type="radio"/> Separated <input type="radio"/> Married <input type="radio"/> De Facto <input type="radio"/> Not Stated <input checked="" type="radio"/> Missing           |         |                      |
| Consent for health assessment to be used in reasearch | <input type="radio"/> Yes <input type="radio"/> No                                                                                                                                                            |         |                      |
| Information obtained by:                              | <input type="text"/>                                                                                                                                                                                          |         |                      |

**EDUCATION LEVEL COMPLETED**

|                          |                                                                                                                                                                                                              |  |  |
|--------------------------|--------------------------------------------------------------------------------------------------------------------------------------------------------------------------------------------------------------|--|--|
| Mother:                  | <input type="radio"/> Year 10 or less <input type="radio"/> Year 11-12 <input type="radio"/> TAFE <input type="radio"/> University <input type="radio"/> Not Stated <input checked="" type="radio"/> Missing |  |  |
| Father:                  | <input type="radio"/> Year 10 or less <input type="radio"/> Year 11-12 <input type="radio"/> TAFE <input type="radio"/> University <input type="radio"/> Not Stated <input checked="" type="radio"/> Missing |  |  |
| Comments:                | <input type="text"/>                                                                                                                                                                                         |  |  |
| Information obtained by: | <input type="text"/>                                                                                                                                                                                         |  |  |

**MENSTRUAL HISTORY**

|                          |                                                                                             |                                                                                             |  |
|--------------------------|---------------------------------------------------------------------------------------------|---------------------------------------------------------------------------------------------|--|
| L.N.M.P                  | Certain:                                                                                    | <input type="radio"/> Yes <input type="radio"/> No <input checked="" type="radio"/> Missing |  |
|                          | First Day of L.N.M.P                                                                        | <input type="text"/>                                                                        |  |
|                          | EDD:                                                                                        | <input type="text"/>                                                                        |  |
| Contraception:           | <input type="radio"/> Yes <input type="radio"/> No <input checked="" type="radio"/> Missing |                                                                                             |  |
| If Yes, please specify:  | <input type="text"/>                                                                        |                                                                                             |  |
| Comments:                | <input type="text"/>                                                                        |                                                                                             |  |
| Information obtained by: | <input type="text"/>                                                                        |                                                                                             |  |

**HISTORY OF PRESENT PREGNANCY**

|                                                    |                                                                                             |                           |                                                            |
|----------------------------------------------------|---------------------------------------------------------------------------------------------|---------------------------|------------------------------------------------------------|
| When was the first antenatal visit?                | <input type="text"/>                                                                        |                           |                                                            |
| G: <input type="text"/><br>P: <input type="text"/> | Date pregnancy confirmed:                                                                   | <input type="text"/>      | K: <input type="text"/>                                    |
| Presenting weight: <input type="text"/> kg         | Height: <input type="text"/> cm                                                             | BMI: <input type="text"/> | Presenting BP: <input type="text"/> / <input type="text"/> |
| Multiple pregnancies:                              | <input type="radio"/> Yes <input type="radio"/> No <input checked="" type="radio"/> Missing |                           | If yes, how many foetuses? <input type="text"/>            |
| Medications                                        | <input type="text"/>                                                                        |                           |                                                            |

|                             |                                                                                             |
|-----------------------------|---------------------------------------------------------------------------------------------|
| (include over the counter): | <input type="text"/>                                                                        |
| Influenza Vaccination:      | <input type="radio"/> Yes <input type="radio"/> No <input checked="" type="radio"/> Missing |
| Comments:                   | <input type="text"/>                                                                        |
| Information obtained by:    | <input type="text"/>                                                                        |

| REFERRED TO                                                                                                                                                                   |                                                                                                                                                                                                                                                                                                                                          |
|-------------------------------------------------------------------------------------------------------------------------------------------------------------------------------|------------------------------------------------------------------------------------------------------------------------------------------------------------------------------------------------------------------------------------------------------------------------------------------------------------------------------------------|
| Type of Care:                                                                                                                                                                 | <input type="radio"/> Indigenous Antenatal Clinic<br><input type="radio"/> Mainstream ANC<br><input type="radio"/> Ipswich<br><input type="radio"/> Logan<br><input type="radio"/> Royal Women's<br><input type="radio"/> Mater Mother's<br><input type="radio"/> Other (please state below)<br><input checked="" type="radio"/> Missing |
| Date of first hospital visit:                                                                                                                                                 | <input type="text"/>                                                                                                                                                                                                                                                                                                                     |
| <input type="radio"/> Share care<br><input type="radio"/> Hospital<br><input type="radio"/> Midwife<br><input type="radio"/> None<br><input checked="" type="radio"/> Missing |                                                                                                                                                                                                                                                                                                                                          |
| Information obtained by:                                                                                                                                                      | <input type="text"/>                                                                                                                                                                                                                                                                                                                     |

| OBSTETRIC HISTORY                                                                                                                                                                            |                      |                      |                      |                                                                                                        |                      |                                                 |                      |                                                                                                          |                      |                      |           |                      |  |  |  |  |  |  |  |  |  |                          |                      |  |  |  |  |  |  |  |  |  |
|----------------------------------------------------------------------------------------------------------------------------------------------------------------------------------------------|----------------------|----------------------|----------------------|--------------------------------------------------------------------------------------------------------|----------------------|-------------------------------------------------|----------------------|----------------------------------------------------------------------------------------------------------|----------------------|----------------------|-----------|----------------------|--|--|--|--|--|--|--|--|--|--------------------------|----------------------|--|--|--|--|--|--|--|--|--|
| no                                                                                                                                                                                           | dob<br>(dd/mm/yyyy)  | gestation<br>(k)     | birth weight<br>(g)  | sex                                                                                                    | type of delivery     | complications of labour, pregnancy & puerperium | hospital             | breast/bottle                                                                                            | baby's name          |                      |           |                      |  |  |  |  |  |  |  |  |  |                          |                      |  |  |  |  |  |  |  |  |  |
| <input type="text"/>                                                                                                                                                                         | <input type="text"/> | <input type="text"/> | <input type="text"/> | <input type="radio"/> Male<br><input type="radio"/> Female<br><input checked="" type="radio"/> Missing | <input type="text"/> | <input type="text"/>                            | <input type="text"/> | <input type="radio"/> Breast<br><input type="radio"/> Bottle<br><input checked="" type="radio"/> Missing | <input type="text"/> | <input type="text"/> |           |                      |  |  |  |  |  |  |  |  |  |                          |                      |  |  |  |  |  |  |  |  |  |
| <input type="button" value="Add Row"/>                                                                                                                                                       |                      |                      |                      |                                                                                                        |                      |                                                 |                      |                                                                                                          |                      |                      |           |                      |  |  |  |  |  |  |  |  |  |                          |                      |  |  |  |  |  |  |  |  |  |
| <table border="1"> <tr> <td>Comments:</td> <td colspan="10"><input type="text"/></td> </tr> <tr> <td>Information obtained by:</td> <td colspan="10"><input type="text"/></td> </tr> </table> |                      |                      |                      |                                                                                                        |                      |                                                 |                      |                                                                                                          |                      |                      | Comments: | <input type="text"/> |  |  |  |  |  |  |  |  |  | Information obtained by: | <input type="text"/> |  |  |  |  |  |  |  |  |  |
| Comments:                                                                                                                                                                                    | <input type="text"/> |                      |                      |                                                                                                        |                      |                                                 |                      |                                                                                                          |                      |                      |           |                      |  |  |  |  |  |  |  |  |  |                          |                      |  |  |  |  |  |  |  |  |  |
| Information obtained by:                                                                                                                                                                     | <input type="text"/> |                      |                      |                                                                                                        |                      |                                                 |                      |                                                                                                          |                      |                      |           |                      |  |  |  |  |  |  |  |  |  |                          |                      |  |  |  |  |  |  |  |  |  |

| HISTORY                                    |                                                                                             |
|--------------------------------------------|---------------------------------------------------------------------------------------------|
| Allergies:                                 | <input type="text"/>                                                                        |
| Chlamydia test:                            | <input type="radio"/> Yes <input type="radio"/> No <input checked="" type="radio"/> Missing |
| Gonorrhoea test:                           | <input type="radio"/> Yes <input type="radio"/> No <input checked="" type="radio"/> Missing |
| 3rd trimester increased risk of Chlamydia: | <input type="radio"/> Yes <input type="radio"/> No <input checked="" type="radio"/> Missing |
| Pap smear:                                 | <input type="radio"/> Yes <input type="radio"/> No <input checked="" type="radio"/> Missing |
| Due:                                       | <input type="text"/>                                                                        |
| Medical and Surgical history:              | <input type="text"/>                                                                        |
| Mental Health history:                     | <input type="text"/>                                                                        |
| General comments:                          | <input type="text"/>                                                                        |
| Information obtained by:                   | <input type="text"/>                                                                        |

| ORAL HEALTH          |                                                                                             |
|----------------------|---------------------------------------------------------------------------------------------|
| Identified Problems: | <input type="radio"/> Yes <input type="radio"/> No <input checked="" type="radio"/> Missing |
| Dental Caries:       | <input type="radio"/> Yes <input type="radio"/> No <input checked="" type="radio"/> Missing |
| Gum Disease:         | <input type="radio"/> Yes <input type="radio"/> No <input checked="" type="radio"/> Missing |

Comments:

Information obtained by:

### FAMILY HISTORY

#### Client's Family history:

Multiple pregnancies:  Yes  No  Missing

Comments:

Information obtained by:

### ACCOMMODATION

|                                           | PRESENTING | 3RD TRIMESTER |
|-------------------------------------------|------------|---------------|
| Type:                                     |            |               |
| Number of people living in accommodation: |            |               |
| Lives with:                               |            |               |
| Comments:                                 |            |               |
| Information obtained by:                  |            |               |

### FAMILY & SOCIAL CIRCUMSTANCES

|                                      | PRESENTING                                                                                  | 3RD TRIMESTER                                                                               |
|--------------------------------------|---------------------------------------------------------------------------------------------|---------------------------------------------------------------------------------------------|
| Sole parent                          | <input type="radio"/> Yes <input type="radio"/> No <input checked="" type="radio"/> Missing | <input type="radio"/> Yes <input type="radio"/> No <input checked="" type="radio"/> Missing |
| If < 18 years old - going to school: | <input type="radio"/> Yes <input type="radio"/> No <input checked="" type="radio"/> Missing | <input type="radio"/> Yes <input type="radio"/> No <input checked="" type="radio"/> Missing |
| Are you employed?                    | <input type="radio"/> Yes <input type="radio"/> No <input checked="" type="radio"/> Missing | <input type="radio"/> Yes <input type="radio"/> No <input checked="" type="radio"/> Missing |
| Partner Employed?                    | <input type="radio"/> Yes <input type="radio"/> No <input checked="" type="radio"/> Missing | <input type="radio"/> Yes <input type="radio"/> No <input checked="" type="radio"/> Missing |
| Family Support?                      | <input type="radio"/> Yes <input type="radio"/> No <input checked="" type="radio"/> Missing | <input type="radio"/> Yes <input type="radio"/> No <input checked="" type="radio"/> Missing |
| Comments:                            |                                                                                             |                                                                                             |
| Information obtained by:             |                                                                                             |                                                                                             |

### VIOLENCE AT HOME AND IN THE COMMUNITY

|                                                                                                      |                                                                                             |
|------------------------------------------------------------------------------------------------------|---------------------------------------------------------------------------------------------|
| Are you ever afraid of your partner?                                                                 | <input type="radio"/> Yes <input type="radio"/> No <input checked="" type="radio"/> Missing |
| In the last year, has your partner hit, kicked, punched or otherwise hurt you?                       | <input type="radio"/> Yes <input type="radio"/> No <input checked="" type="radio"/> Missing |
| In the last year, has your partner put you down, humiliated you or tried to control what you can do? | <input type="radio"/> Yes <input type="radio"/> No <input checked="" type="radio"/> Missing |
| In the last year, has your partner threatened to hurt you?                                           | <input type="radio"/> Yes <input type="radio"/> No <input checked="" type="radio"/> Missing |
| Would you like help with any of this now? (if domestic violence identified)                          | <input type="radio"/> Yes <input type="radio"/> No <input checked="" type="radio"/> Missing |
| Do you feel threatened or afraid by anyone in the community?                                         | <input type="radio"/> Yes <input type="radio"/> No <input checked="" type="radio"/> Missing |
| Comments:                                                                                            |                                                                                             |
| Information obtained by:                                                                             |                                                                                             |

### NUTRITION

|                               |                                                                                             |
|-------------------------------|---------------------------------------------------------------------------------------------|
| Nutrition problem identified: | <input type="radio"/> Yes <input type="radio"/> No <input checked="" type="radio"/> Missing |
| Folic Acid Supplementation:   | <input type="radio"/> Yes <input type="radio"/> No <input checked="" type="radio"/> Missing |
| Iodine:                       | <input type="radio"/> Yes <input type="radio"/> No <input checked="" type="radio"/> Missing |
| Iron Supplementation:         | <input type="radio"/> Yes <input type="radio"/> No <input checked="" type="radio"/> Missing |
| Education provided:           | <input type="radio"/> Yes <input type="radio"/> No <input checked="" type="radio"/> Missing |
| Comments:                     |                                                                                             |
| Information Obtained by:      |                                                                                             |

| HISTORY OF CAFFEINE                                                              |                                                                                             |
|----------------------------------------------------------------------------------|---------------------------------------------------------------------------------------------|
| Caffeine (coffee, tea, green tea, Red Bull, V drinks, Coke, Pepsi, iced coffee): | <input type="radio"/> Yes <input type="radio"/> No <input checked="" type="radio"/> Missing |
| Drinks per day:                                                                  |                                                                                             |
| Comments:                                                                        |                                                                                             |
| Information obtained by:                                                         |                                                                                             |

| MATERNAL HISTORY OF TOBACCO USE                                                        |                                                                                                                                        |                                                                                             |                                                                                                                                                                                                                   |
|----------------------------------------------------------------------------------------|----------------------------------------------------------------------------------------------------------------------------------------|---------------------------------------------------------------------------------------------|-------------------------------------------------------------------------------------------------------------------------------------------------------------------------------------------------------------------|
| Definitions are those given by Healthy for Life and are required for data collection   |                                                                                                                                        |                                                                                             |                                                                                                                                                                                                                   |
| Question: How often, if at all, do you now smoke cigarettes of other tobacco products? |                                                                                                                                        |                                                                                             |                                                                                                                                                                                                                   |
| Category                                                                               | Definition                                                                                                                             | 1st Trimester < K13                                                                         | 3rd Trimester                                                                                                                                                                                                     |
| Daily smoker                                                                           | Smokes daily                                                                                                                           | <input type="radio"/> Yes <input type="radio"/> No <input checked="" type="radio"/> Missing | <input type="radio"/> Yes <input type="radio"/> No <input checked="" type="radio"/> Missing                                                                                                                       |
| Weekly smoker                                                                          | Smokes at least weekly but not daily                                                                                                   | <input type="radio"/> Yes <input type="radio"/> No <input checked="" type="radio"/> Missing | <input type="radio"/> Yes <input type="radio"/> No <input checked="" type="radio"/> Missing                                                                                                                       |
| Irregular smoker                                                                       | Smokes less than weekly                                                                                                                | <input type="radio"/> Yes <input type="radio"/> No <input checked="" type="radio"/> Missing | <input type="radio"/> Yes <input type="radio"/> No <input checked="" type="radio"/> Missing                                                                                                                       |
| Ex-smoker Quit during pregnancy                                                        | Does not smoke at all now, but has smoked at least a hundred cigarettes in their lifetime and did smoke at some stage during pregnancy | <input type="radio"/> Yes <input type="radio"/> No <input checked="" type="radio"/> Missing | <input type="radio"/> Yes <input type="radio"/> No <input checked="" type="radio"/> Missing<br>If Yes, by 20 weeks<br><input type="radio"/> Yes <input type="radio"/> No <input checked="" type="radio"/> Missing |
| Ex-smoker Quit before pregnancy                                                        | Does not smoke at all now, but has smoked at least a hundred cigarettes in their lifetime and did not smoke at all during pregnancy    | <input type="radio"/> Yes <input type="radio"/> No <input checked="" type="radio"/> Missing | <input type="radio"/> Yes <input type="radio"/> No <input checked="" type="radio"/> Missing                                                                                                                       |
| Non-smoker                                                                             | Does not smoke now and has smoked fewer than 100 cigarettes in their lifetime                                                          | <input type="radio"/> Yes <input type="radio"/> No <input checked="" type="radio"/> Missing | <input type="radio"/> Yes <input type="radio"/> No <input checked="" type="radio"/> Missing                                                                                                                       |
| Comments:                                                                              |                                                                                                                                        |                                                                                             |                                                                                                                                                                                                                   |
| Information obtained by:                                                               |                                                                                                                                        |                                                                                             |                                                                                                                                                                                                                   |

| PATERNAL HISTORY OF TOBACCO USE |                                                                                             |
|---------------------------------|---------------------------------------------------------------------------------------------|
| <b>Smoking</b>                  |                                                                                             |
| Current Smoker?                 | <input type="radio"/> Yes <input type="radio"/> No <input checked="" type="radio"/> Missing |
| Comments:                       |                                                                                             |
| Information obtained by:        |                                                                                             |

| MATERNAL HISTORY OF ALCOHOL USE                                                                |                                             |                                                                                             |                                                                                             |
|------------------------------------------------------------------------------------------------|---------------------------------------------|---------------------------------------------------------------------------------------------|---------------------------------------------------------------------------------------------|
| Definitions are those given by Healthy for Life and are required for data collection           |                                             |                                                                                             |                                                                                             |
| Question: At any time during your pregnancy have you consumed alcohol? If Yes: How frequently? |                                             |                                                                                             |                                                                                             |
| Category                                                                                       | Definition                                  | 1st Trimester < K13                                                                         | 3rd Trimester                                                                               |
| High 1                                                                                         | Over a week has more than 7 standard drinks | <input type="radio"/> Yes <input type="radio"/> No <input checked="" type="radio"/> Missing | <input type="radio"/> Yes <input type="radio"/> No <input checked="" type="radio"/> Missing |

|                          |                                                                                                                              |                                                                                             |                                                                                             |
|--------------------------|------------------------------------------------------------------------------------------------------------------------------|---------------------------------------------------------------------------------------------|---------------------------------------------------------------------------------------------|
| High 2                   | On any day more than 2 standard drinks                                                                                       | <input type="radio"/> Yes <input type="radio"/> No <input checked="" type="radio"/> Missing | <input type="radio"/> Yes <input type="radio"/> No <input checked="" type="radio"/> Missing |
| Low                      | Over a week has less than 7 standard drinks AND on any one day no more than 2 standard drinks (spread over at least 2 hours) | <input type="radio"/> Yes <input type="radio"/> No <input checked="" type="radio"/> Missing | <input type="radio"/> Yes <input type="radio"/> No <input checked="" type="radio"/> Missing |
| No Alcohol               | A person who does not drink at all during pregnancy                                                                          | <input type="radio"/> Yes <input type="radio"/> No <input checked="" type="radio"/> Missing | <input type="radio"/> Yes <input type="radio"/> No <input checked="" type="radio"/> Missing |
| Comments:                |                                                                                                                              |                                                                                             |                                                                                             |
| Information obtained by: |                                                                                                                              |                                                                                             |                                                                                             |

#### PATERNAL HISTORY OF ALCOHOL USE

|                                         |                                                                                             |
|-----------------------------------------|---------------------------------------------------------------------------------------------|
| <b>Alcohol</b>                          |                                                                                             |
| Alcohol 0-4 standard drinks per day     | <input type="radio"/> Yes <input type="radio"/> No <input checked="" type="radio"/> Missing |
| Alcohol > 4 standard drinks per day     | <input type="radio"/> Yes <input type="radio"/> No <input checked="" type="radio"/> Missing |
| Alcohol free days (at least 2) per week | <input type="radio"/> Yes <input type="radio"/> No <input checked="" type="radio"/> Missing |
| Binge drinking                          | <input type="radio"/> Yes <input type="radio"/> No <input checked="" type="radio"/> Missing |
| Comments:                               |                                                                                             |
| Information obtained by:                |                                                                                             |

#### MATERNAL RECREATIONAL/PSYCHOACTIVE DRUGS

|                                                                                                                                                                  |                                                                                             |
|------------------------------------------------------------------------------------------------------------------------------------------------------------------|---------------------------------------------------------------------------------------------|
| Definitions are those given by Healthy for Life and are required for data collection                                                                             |                                                                                             |
| Healthy for Life have provided the illicit drugs listed below:<br>Any pharmaceutical drug (such as pain killers and tranquilisers) when used for NON-MEDICAL use |                                                                                             |
| Have you used other substances:                                                                                                                                  | <input type="radio"/> Yes <input type="radio"/> No <input checked="" type="radio"/> Missing |
| marijuana                                                                                                                                                        | <input type="radio"/> Yes <input type="radio"/> No <input checked="" type="radio"/> Missing |
| barbiturates                                                                                                                                                     | <input type="radio"/> Yes <input type="radio"/> No <input checked="" type="radio"/> Missing |
| heroin                                                                                                                                                           | <input type="radio"/> Yes <input type="radio"/> No <input checked="" type="radio"/> Missing |
| cocaine                                                                                                                                                          | <input type="radio"/> Yes <input type="radio"/> No <input checked="" type="radio"/> Missing |
| ecstasy                                                                                                                                                          | <input type="radio"/> Yes <input type="radio"/> No <input checked="" type="radio"/> Missing |
| any injected drug                                                                                                                                                | <input type="radio"/> Yes <input type="radio"/> No <input checked="" type="radio"/> Missing |
| pain killers / analgesics                                                                                                                                        | <input type="radio"/> Yes <input type="radio"/> No <input checked="" type="radio"/> Missing |
| meth / amphetamines (speed)                                                                                                                                      | <input type="radio"/> Yes <input type="radio"/> No <input checked="" type="radio"/> Missing |
| methadone                                                                                                                                                        | <input type="radio"/> Yes <input type="radio"/> No <input checked="" type="radio"/> Missing |
| LSD /synthetic hallucinogens                                                                                                                                     | <input type="radio"/> Yes <input type="radio"/> No <input checked="" type="radio"/> Missing |
| ketamine                                                                                                                                                         | <input type="radio"/> Yes <input type="radio"/> No <input checked="" type="radio"/> Missing |
| tranquilisers/sleeping pills                                                                                                                                     | <input type="radio"/> Yes <input type="radio"/> No <input checked="" type="radio"/> Missing |
| steroids                                                                                                                                                         | <input type="radio"/> Yes <input type="radio"/> No <input checked="" type="radio"/> Missing |

| other opiates (opiods)                                        | <input type="radio"/> Yes <input type="radio"/> No <input checked="" type="radio"/> Missing            |                                                                                             |                                                                                             |
|---------------------------------------------------------------|--------------------------------------------------------------------------------------------------------|---------------------------------------------------------------------------------------------|---------------------------------------------------------------------------------------------|
| natural hallucinogens                                         | <input type="radio"/> Yes <input type="radio"/> No <input checked="" type="radio"/> Missing            |                                                                                             |                                                                                             |
| inhalants                                                     | <input type="radio"/> Yes <input type="radio"/> No <input checked="" type="radio"/> Missing            |                                                                                             |                                                                                             |
| Question: How often, if at all, do you now use illicit drugs? |                                                                                                        |                                                                                             |                                                                                             |
| Category                                                      | Definition                                                                                             | 1st Trimester < K13                                                                         | 3rd Trimester                                                                               |
| Daily                                                         | Uses every day                                                                                         | <input type="radio"/> Yes <input type="radio"/> No <input checked="" type="radio"/> Missing | <input type="radio"/> Yes <input type="radio"/> No <input checked="" type="radio"/> Missing |
| Weekly                                                        | Uses at least weekly but not daily                                                                     | <input type="radio"/> Yes <input type="radio"/> No <input checked="" type="radio"/> Missing | <input type="radio"/> Yes <input type="radio"/> No <input checked="" type="radio"/> Missing |
| Irregular                                                     | Uses less than weekly                                                                                  | <input type="radio"/> Yes <input type="radio"/> No <input checked="" type="radio"/> Missing | <input type="radio"/> Yes <input type="radio"/> No <input checked="" type="radio"/> Missing |
| Ex-user 1                                                     | Does not use at all now, but has used in the last 12 months and did use at some stage during pregnancy | <input type="radio"/> Yes <input type="radio"/> No <input checked="" type="radio"/> Missing | <input type="radio"/> Yes <input type="radio"/> No <input checked="" type="radio"/> Missing |
| Ex-user 2                                                     | Does not use at all now, and not use at any stage during pregnancy, but has used in the last 12 months | <input type="radio"/> Yes <input type="radio"/> No <input checked="" type="radio"/> Missing | <input type="radio"/> Yes <input type="radio"/> No <input checked="" type="radio"/> Missing |
| Non-user                                                      | Does not use now and has not used in the last 12 months                                                | <input type="radio"/> Yes <input type="radio"/> No <input checked="" type="radio"/> Missing | <input type="radio"/> Yes <input type="radio"/> No <input checked="" type="radio"/> Missing |
| Comments:                                                     |                                                                                                        |                                                                                             |                                                                                             |
| Information obtained by:                                      |                                                                                                        |                                                                                             |                                                                                             |

| PATERNAL RECREATIONAL / PSYCHOACTIVE DRUGS |                                                                                             |                          |                                                                                             |
|--------------------------------------------|---------------------------------------------------------------------------------------------|--------------------------|---------------------------------------------------------------------------------------------|
| Cannabis                                   | <input type="radio"/> Yes <input type="radio"/> No <input checked="" type="radio"/> Missing | Amphetamines / speed     | <input type="radio"/> Yes <input type="radio"/> No <input checked="" type="radio"/> Missing |
| Heroin                                     | <input type="radio"/> Yes <input type="radio"/> No <input checked="" type="radio"/> Missing | Ice                      | <input type="radio"/> Yes <input type="radio"/> No <input checked="" type="radio"/> Missing |
| Methadone                                  | <input type="radio"/> Yes <input type="radio"/> No <input checked="" type="radio"/> Missing | Chroming                 | <input type="radio"/> Yes <input type="radio"/> No <input checked="" type="radio"/> Missing |
| Cocaine                                    | <input type="radio"/> Yes <input type="radio"/> No <input checked="" type="radio"/> Missing | Other psychoactive drugs | <input type="radio"/> Yes <input type="radio"/> No <input checked="" type="radio"/> Missing |
| IV injection                               | <input type="radio"/> Yes <input type="radio"/> No <input checked="" type="radio"/> Missing | Shared needles           | <input type="radio"/> Yes <input type="radio"/> No <input checked="" type="radio"/> Missing |
| Prescription Drugs                         | <input type="radio"/> Yes <input type="radio"/> No <input checked="" type="radio"/> Missing | Non-prescription drugs   | <input type="radio"/> Yes <input type="radio"/> No <input checked="" type="radio"/> Missing |
| Comments:                                  |                                                                                             |                          |                                                                                             |
| Information obtained by:                   |                                                                                             |                          |                                                                                             |

| ULTRASOUND                             |                      |                      |                      |                      |                                       |
|----------------------------------------|----------------------|----------------------|----------------------|----------------------|---------------------------------------|
| Date<br>(dd/mm/yyyy)                   | K                    | EDC<br>(dd/mm/yyyy)  | Comments             | Initial              |                                       |
| <input type="text"/>                   | <input type="text"/> | <input type="text"/> | <input type="text"/> | <input type="text"/> | <input type="button" value="Delete"/> |
| <input type="button" value="Add Row"/> |                      |                      |                      |                      |                                       |

| URINE SCREENING             |                                                                                                        |                      |                                                                                                        |
|-----------------------------|--------------------------------------------------------------------------------------------------------|----------------------|--------------------------------------------------------------------------------------------------------|
| Date collected:             | <input type="text"/>                                                                                   | <input type="text"/> |                                                                                                        |
| Results:                    |                                                                                                        |                      |                                                                                                        |
| Chlamydia:                  | <input type="radio"/> Positive <input type="radio"/> Negative <input checked="" type="radio"/> Missing | Gonorrhoea:          | <input type="radio"/> Positive <input type="radio"/> Negative <input checked="" type="radio"/> Missing |
| Rx (if required):           | <input type="radio"/> Yes <input type="radio"/> No <input checked="" type="radio"/> Missing            |                      |                                                                                                        |
| UTI Screening (MSU Result): | <input type="radio"/> Positive <input type="radio"/> Negative <input checked="" type="radio"/> Missing |                      |                                                                                                        |
| Comment:                    | <input type="text"/>                                                                                   |                      |                                                                                                        |
| Information obtained by:    | <input type="text"/>                                                                                   |                      |                                                                                                        |

**LABORATORY RESULTS**

| K weeks | Date                 | Blood group          | Rhesus Status                                                                                                | Antibody screen                                                                                              | Hb g/L               | RPR/ TPHA                                                                                                    | Hep B                                                                                                        | Rubella Titre                                                                                                | HIV                                                                                                          | LAB                  | Initials             |
|---------|----------------------|----------------------|--------------------------------------------------------------------------------------------------------------|--------------------------------------------------------------------------------------------------------------|----------------------|--------------------------------------------------------------------------------------------------------------|--------------------------------------------------------------------------------------------------------------|--------------------------------------------------------------------------------------------------------------|--------------------------------------------------------------------------------------------------------------|----------------------|----------------------|
| K5-12   | <input type="text"/> | <input type="text"/> | <input type="radio"/> Positive<br><input type="radio"/> Negative<br><input checked="" type="radio"/> Missing | <input type="radio"/> Positive<br><input type="radio"/> Negative<br><input checked="" type="radio"/> Missing | <input type="text"/> | <input type="radio"/> Positive<br><input type="radio"/> Negative<br><input checked="" type="radio"/> Missing | <input type="radio"/> Positive<br><input type="radio"/> Negative<br><input checked="" type="radio"/> Missing | <input type="radio"/> Positive<br><input type="radio"/> Negative<br><input checked="" type="radio"/> Missing | <input type="radio"/> Positive<br><input type="radio"/> Negative<br><input checked="" type="radio"/> Missing | <input type="text"/> | <input type="text"/> |
| K28     | <input type="text"/> | <input type="text"/> | <input type="radio"/> Positive<br><input type="radio"/> Negative<br><input checked="" type="radio"/> Missing | <input type="radio"/> Positive<br><input type="radio"/> Negative<br><input checked="" type="radio"/> Missing | <input type="text"/> | <input type="radio"/> Positive<br><input type="radio"/> Negative<br><input checked="" type="radio"/> Missing | <input type="radio"/> Positive<br><input type="radio"/> Negative<br><input checked="" type="radio"/> Missing | <input type="radio"/> Positive<br><input type="radio"/> Negative<br><input checked="" type="radio"/> Missing | <input type="radio"/> Positive<br><input type="radio"/> Negative<br><input checked="" type="radio"/> Missing | <input type="text"/> | <input type="text"/> |
| K36     | <input type="text"/> | <input type="text"/> | <input type="radio"/> Positive<br><input type="radio"/> Negative<br><input checked="" type="radio"/> Missing | <input type="radio"/> Positive<br><input type="radio"/> Negative<br><input checked="" type="radio"/> Missing | <input type="text"/> | <input type="radio"/> Positive<br><input type="radio"/> Negative<br><input checked="" type="radio"/> Missing | <input type="radio"/> Positive<br><input type="radio"/> Negative<br><input checked="" type="radio"/> Missing | <input type="radio"/> Positive<br><input type="radio"/> Negative<br><input checked="" type="radio"/> Missing | <input type="radio"/> Positive<br><input type="radio"/> Negative<br><input checked="" type="radio"/> Missing | <input type="text"/> | <input type="text"/> |
| Other   | <input type="text"/> | <input type="text"/> | <input type="radio"/> Positive<br><input type="radio"/> Negative<br><input checked="" type="radio"/> Missing | <input type="radio"/> Positive<br><input type="radio"/> Negative<br><input checked="" type="radio"/> Missing | <input type="text"/> | <input type="radio"/> Positive<br><input type="radio"/> Negative<br><input checked="" type="radio"/> Missing | <input type="radio"/> Positive<br><input type="radio"/> Negative<br><input checked="" type="radio"/> Missing | <input type="radio"/> Positive<br><input type="radio"/> Negative<br><input checked="" type="radio"/> Missing | <input type="radio"/> Positive<br><input type="radio"/> Negative<br><input checked="" type="radio"/> Missing | <input type="text"/> | <input type="text"/> |

Comments:

Please initial after each result obtained

**GLUCOSE TEST**

|                                 |                      |         |                                                                                             |
|---------------------------------|----------------------|---------|---------------------------------------------------------------------------------------------|
| Date:                           | <input type="text"/> | Normal: | <input type="radio"/> Yes <input type="radio"/> No <input checked="" type="radio"/> Missing |
| Comments:                       | <input type="text"/> |         |                                                                                             |
| Please initial after completed: | <input type="text"/> |         |                                                                                             |

**ANTENATAL EDUCATION**

| Topic                               |                                                                                             | Date                 | Initials             |
|-------------------------------------|---------------------------------------------------------------------------------------------|----------------------|----------------------|
| aches and pains                     | <input type="radio"/> Yes <input type="radio"/> No <input checked="" type="radio"/> Missing | <input type="text"/> | <input type="text"/> |
| alcohol during pregnancy (incl FAS) | <input type="radio"/> Yes <input type="radio"/> No <input checked="" type="radio"/> Missing | <input type="text"/> | <input type="text"/> |
| breast feeding                      | <input type="radio"/> Yes <input type="radio"/> No <input checked="" type="radio"/> Missing | <input type="text"/> | <input type="text"/> |
| constipation                        | <input type="radio"/> Yes <input type="radio"/> No <input checked="" type="radio"/> Missing | <input type="text"/> | <input type="text"/> |
| diabetes                            | <input type="radio"/> Yes <input type="radio"/> No <input checked="" type="radio"/> Missing | <input type="text"/> | <input type="text"/> |
| drug use                            | <input type="radio"/> Yes <input type="radio"/> No <input checked="" type="radio"/> Missing | <input type="text"/> | <input type="text"/> |
| early discharge from hospital       | <input type="radio"/> Yes <input type="radio"/> No <input checked="" type="radio"/> Missing | <input type="text"/> | <input type="text"/> |
| haemorrhoids                        | <input type="radio"/> Yes <input type="radio"/> No <input checked="" type="radio"/> Missing | <input type="text"/> | <input type="text"/> |
| heartburn                           | <input type="radio"/> Yes <input type="radio"/> No <input checked="" type="radio"/> Missing | <input type="text"/> | <input type="text"/> |
| itchy skin                          | <input type="radio"/> Yes <input type="radio"/> No <input checked="" type="radio"/> Missing | <input type="text"/> | <input type="text"/> |
| labour                              | <input type="radio"/> Yes <input type="radio"/> No <input checked="" type="radio"/> Missing | <input type="text"/> | <input type="text"/> |
| morning sickness                    | <input type="radio"/> Yes <input type="radio"/> No <input checked="" type="radio"/> Missing | <input type="text"/> | <input type="text"/> |
| nutrition during pregnancy          | <input type="radio"/> Yes <input type="radio"/> No <input checked="" type="radio"/> Missing | <input type="text"/> | <input type="text"/> |
| regular antenatal checks            | <input type="radio"/> Yes <input type="radio"/> No <input checked="" type="radio"/> Missing | <input type="text"/> | <input type="text"/> |
| sexual health                       | <input type="radio"/> Yes <input type="radio"/> No <input checked="" type="radio"/> Missing | <input type="text"/> | <input type="text"/> |
| smoking during pregnancy            | <input type="radio"/> Yes <input type="radio"/> No <input checked="" type="radio"/> Missing | <input type="text"/> | <input type="text"/> |
| tiredness                           | <input type="radio"/> Yes <input type="radio"/> No <input checked="" type="radio"/> Missing | <input type="text"/> | <input type="text"/> |
| when to go to hospital              | <input type="radio"/> Yes <input type="radio"/> No <input checked="" type="radio"/> Missing | <input type="text"/> | <input type="text"/> |
| Comments:                           | <input type="text"/>                                                                        |                      |                      |

Please initial beside each education topic

### ANTENATAL VISITS DURING PREGNANCY

| Date<br>(dd/mm/yyyy)                   | K                    | BP<br>(Systolic/Diastolic)                  | WT<br>(kg)           | Dysuria                                               | WTU                                                                                                                                                       | FMF                  | FH                   | Oedema                                                | Comment              | Initials             |                                       |
|----------------------------------------|----------------------|---------------------------------------------|----------------------|-------------------------------------------------------|-----------------------------------------------------------------------------------------------------------------------------------------------------------|----------------------|----------------------|-------------------------------------------------------|----------------------|----------------------|---------------------------------------|
| <input type="text"/>                   | <input type="text"/> | <input type="text"/> / <input type="text"/> | <input type="text"/> | <input type="radio"/> Yes<br><input type="radio"/> No | <b>Proteinuria</b><br><input type="radio"/> Yes<br><input type="radio"/> No<br><b>Leucocytes</b><br><input type="radio"/> Yes<br><input type="radio"/> No | <input type="text"/> | <input type="text"/> | <input type="radio"/> Yes<br><input type="radio"/> No | <input type="text"/> | <input type="text"/> | <input type="button" value="Delete"/> |
| <input type="button" value="Add Row"/> |                      |                                             |                      |                                                       |                                                                                                                                                           |                      |                      |                                                       |                      |                      |                                       |

### OTHER VISITS

| Date<br>(dd/mm/yyyy)                   | K                    | Comments             | Initial              |                                       |
|----------------------------------------|----------------------|----------------------|----------------------|---------------------------------------|
| <input type="text"/>                   | <input type="text"/> | <input type="text"/> | <input type="text"/> | <input type="button" value="Delete"/> |
| <input type="button" value="Add Row"/> |                      |                      |                      |                                       |

### POSTNATAL

|                          |                                                                                                                                                                                                          |
|--------------------------|----------------------------------------------------------------------------------------------------------------------------------------------------------------------------------------------------------|
| Intra-partum             |                                                                                                                                                                                                          |
| Labour                   | <input type="radio"/> Spontaneous<br><input type="radio"/> Induced<br><input checked="" type="radio"/> Missing                                                                                           |
| Type of delivery         | <input type="radio"/> SVD<br><input type="radio"/> Instrumental SVD<br><input type="radio"/> Elective Caesarian<br><input type="radio"/> Emergency Caesarian<br><input checked="" type="radio"/> Missing |
| Comments:                | <input type="text"/>                                                                                                                                                                                     |
| Information obtained by: | <input type="text"/>                                                                                                                                                                                     |

### BIRTH DETAILS

|                            |                                                                                             |                                                                                                |                            |
|----------------------------|---------------------------------------------------------------------------------------------|------------------------------------------------------------------------------------------------|----------------------------|
| <b>Baby Details below:</b> |                                                                                             |                                                                                                |                            |
| Surname:                   | <input type="text"/>                                                                        | First(Name)                                                                                    | <input type="text"/>       |
| DOB:                       | <input type="text"/>                                                                        | Place of birth:                                                                                | <input type="text"/>       |
| Baby(UR) :                 | <input type="text"/>                                                                        |                                                                                                |                            |
| Gestational(age)           | <input type="text"/> K                                                                      | Weight:                                                                                        | <input type="text"/> g     |
| Length:                    | <input type="text"/> cm                                                                     | Head(Circumference)                                                                            | <input type="text"/> cm    |
| Apgar:                     | <input type="text"/> (1)                                                                    | <input type="text"/> (5)                                                                       |                            |
| Vitamin K given:           | <input type="radio"/> Yes <input type="radio"/> No <input checked="" type="radio"/> Missing | Date:                                                                                          | <input type="text"/>       |
| Neonatal(Screening)        | <input type="radio"/> Yes <input type="radio"/> No <input checked="" type="radio"/> Missing | Date:                                                                                          | <input type="text"/>       |
| Hearing Screening done:    | <input type="radio"/> Yes <input type="radio"/> No <input checked="" type="radio"/> Missing | <input type="radio"/> Pass <input type="radio"/> Fail <input checked="" type="radio"/> Missing | Date: <input type="text"/> |
| Hepatitis B given:         | <input type="radio"/> Yes <input type="radio"/> No <input checked="" type="radio"/> Missing | Date:                                                                                          | <input type="text"/>       |
| Complications:             | <input type="text"/>                                                                        |                                                                                                |                            |
| Comments:                  | <input type="text"/>                                                                        |                                                                                                |                            |
| <b>Feeding at Birth</b>    |                                                                                             | <b>Discharge Details</b>                                                                       |                            |
| Fully breast feeding       | <input type="radio"/> Yes <input type="radio"/> No <input checked="" type="radio"/> Missing | Date:                                                                                          | <input type="text"/>       |
| Partially breast feeding   | <input type="radio"/> Yes <input type="radio"/> No <input checked="" type="radio"/> Missing | Age:                                                                                           | <input type="text"/>       |
| Formula(brand)             | <input type="radio"/> Yes <input type="radio"/> No <input checked="" type="radio"/> Missing | Weight:                                                                                        | <input type="text"/> g     |
| Expressed breast milk      | <input type="radio"/> Yes <input type="radio"/> No <input checked="" type="radio"/> Missing |                                                                                                |                            |



|                                  |                                                                                             |  |
|----------------------------------|---------------------------------------------------------------------------------------------|--|
| Other                            | <input type="radio"/> Yes <input type="radio"/> No <input checked="" type="radio"/> Missing |  |
| Comments:                        |                                                                                             |  |
| Information obtained by zat one: |                                                                                             |  |

**Add Baby**

| MOTHER POSTNATAL PROGRESS (FIRST VISIT POST DELIVERY) |                                                                                             |                         |                                                                                             |
|-------------------------------------------------------|---------------------------------------------------------------------------------------------|-------------------------|---------------------------------------------------------------------------------------------|
| Discussed with patient?                               |                                                                                             | Discussed with patient? |                                                                                             |
| breast / nipples                                      | <input type="radio"/> Yes <input type="radio"/> No <input checked="" type="radio"/> Missing | dysuria                 | <input type="radio"/> Yes <input type="radio"/> No <input checked="" type="radio"/> Missing |
| perineum                                              | <input type="radio"/> Yes <input type="radio"/> No <input checked="" type="radio"/> Missing | legs                    | <input type="radio"/> Yes <input type="radio"/> No <input checked="" type="radio"/> Missing |
| abdominal wound                                       | <input type="radio"/> Yes <input type="radio"/> No <input checked="" type="radio"/> Missing | diet                    | <input type="radio"/> Yes <input type="radio"/> No <input checked="" type="radio"/> Missing |
| lochia                                                | <input type="radio"/> Yes <input type="radio"/> No <input checked="" type="radio"/> Missing | maternal mood           | <input type="radio"/> Yes <input type="radio"/> No <input checked="" type="radio"/> Missing |
| fundal height ( if applicable)                        | <input type="radio"/> Yes <input type="radio"/> No <input checked="" type="radio"/> Missing | Needs Pap Smear         | <input type="radio"/> Yes <input type="radio"/> No <input checked="" type="radio"/> Missing |
| Contraception required?                               | <input type="radio"/> Yes <input type="radio"/> No <input checked="" type="radio"/> Missing |                         |                                                                                             |
| Other                                                 | <input type="radio"/> Yes <input type="radio"/> No <input checked="" type="radio"/> Missing | Postnatal check due     | <input type="radio"/> Yes <input type="radio"/> No <input checked="" type="radio"/> Missing |
| Comments:                                             |                                                                                             |                         |                                                                                             |
| Information obtained by:                              |                                                                                             |                         |                                                                                             |

| BABY POSTNATAL PROGRESS (FIRST VISIT POST DELIVERY)         |                                                                                             |
|-------------------------------------------------------------|---------------------------------------------------------------------------------------------|
| Preterm delivery:                                           | <input type="radio"/> Yes <input type="radio"/> No <input checked="" type="radio"/> Missing |
| Congenital abnormalities:                                   | <input type="radio"/> Yes <input type="radio"/> No <input checked="" type="radio"/> Missing |
| infection:                                                  | <input type="radio"/> Yes <input type="radio"/> No <input checked="" type="radio"/> Missing |
| jaundice:                                                   | <input type="radio"/> Yes <input type="radio"/> No <input checked="" type="radio"/> Missing |
| Was baby admitted to Special Care Nursery / Intensive Care? | <input type="radio"/> Yes <input type="radio"/> No <input checked="" type="radio"/> Missing |
| other:                                                      | <input type="radio"/> Yes <input type="radio"/> No <input checked="" type="radio"/> Missing |
| Comments:                                                   |                                                                                             |
| Information obtained by:                                    |                                                                                             |

| PROBLEM LIST |  |
|--------------|--|
|              |  |

| ACTIONS       |                                                                                             |
|---------------|---------------------------------------------------------------------------------------------|
| Advice:       | <input type="radio"/> Yes <input type="radio"/> No <input checked="" type="radio"/> Missing |
| If yes, what: |                                                                                             |
|               |                                                                                             |

|                  |                                                                                             |
|------------------|---------------------------------------------------------------------------------------------|
| Pap Smears:      | <input type="radio"/> Yes <input type="radio"/> No <input checked="" type="radio"/> Missing |
| If yes, what:    | <input type="text"/>                                                                        |
| New Medications: | <input type="radio"/> Yes <input type="radio"/> No <input checked="" type="radio"/> Missing |
| If yes, what:    | <input type="text"/>                                                                        |
| Immunisation:    | <input type="radio"/> Yes <input type="radio"/> No <input checked="" type="radio"/> Missing |
| If yes, what:    | <input type="text"/>                                                                        |
| Referrals:       | <input type="radio"/> Yes <input type="radio"/> No <input checked="" type="radio"/> Missing |
| If yes, what:    | <input type="text"/>                                                                        |
| Other Action:    | <input type="radio"/> Yes <input type="radio"/> No <input checked="" type="radio"/> Missing |
| If yes, what:    | <input type="text"/>                                                                        |

|                                                                                             |                      |                                     |
|---------------------------------------------------------------------------------------------|----------------------|-------------------------------------|
| <b>Sign Off</b>                                                                             |                      |                                     |
| <input type="checkbox"/> <b>Completed?</b> (Select this only when Health Check is complete) |                      |                                     |
| <b>User Name</b>                                                                            | <input type="text"/> | <b>Password</b>                     |
|                                                                                             |                      | <input type="button" value="Save"/> |

Health Check Completed by:

Signed:

Date:
